# Supplementary material for: Comparative Analysis and Identification of Terpene Synthase Genes in Convallaria keiskei Leaf, Flower and Root Using RNA-Sequencing Profiling
Source: MDPI journal article supplement (doi:10.3390/plants12152797), 2023-07-28
Supplement: s1 [file s1]

Article

# Comparative analysis and identification of terpene synthase genes in *Convallaria keiskei* leaf, flower and root using RNA-sequencing profiling

Gurusamy Raman<sup>†§</sup>, Sivagami Jean Claude<sup>†</sup>, and SeonJoo Park<sup>\*</sup>

Department of Life Sciences, Yeungnam University, Gyeongsan, Gyeongbuk 38541, South Korea.

\* Correspondence: SeonJoo Park; sjpark01@ynu.ac.kr

§ Co-Correspondence: Gurusamy Raman; bioramg@yu.ac.kr

† Both authors contributed equally to this manuscript

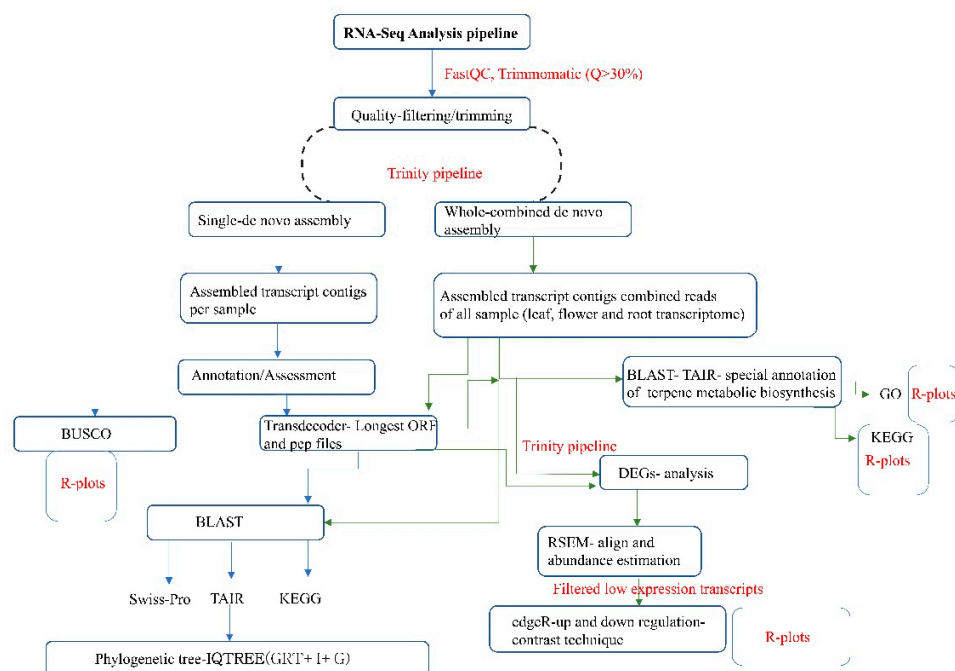

**Supplementary Fig S1:** Schematic diagram for a transcriptome assembly method

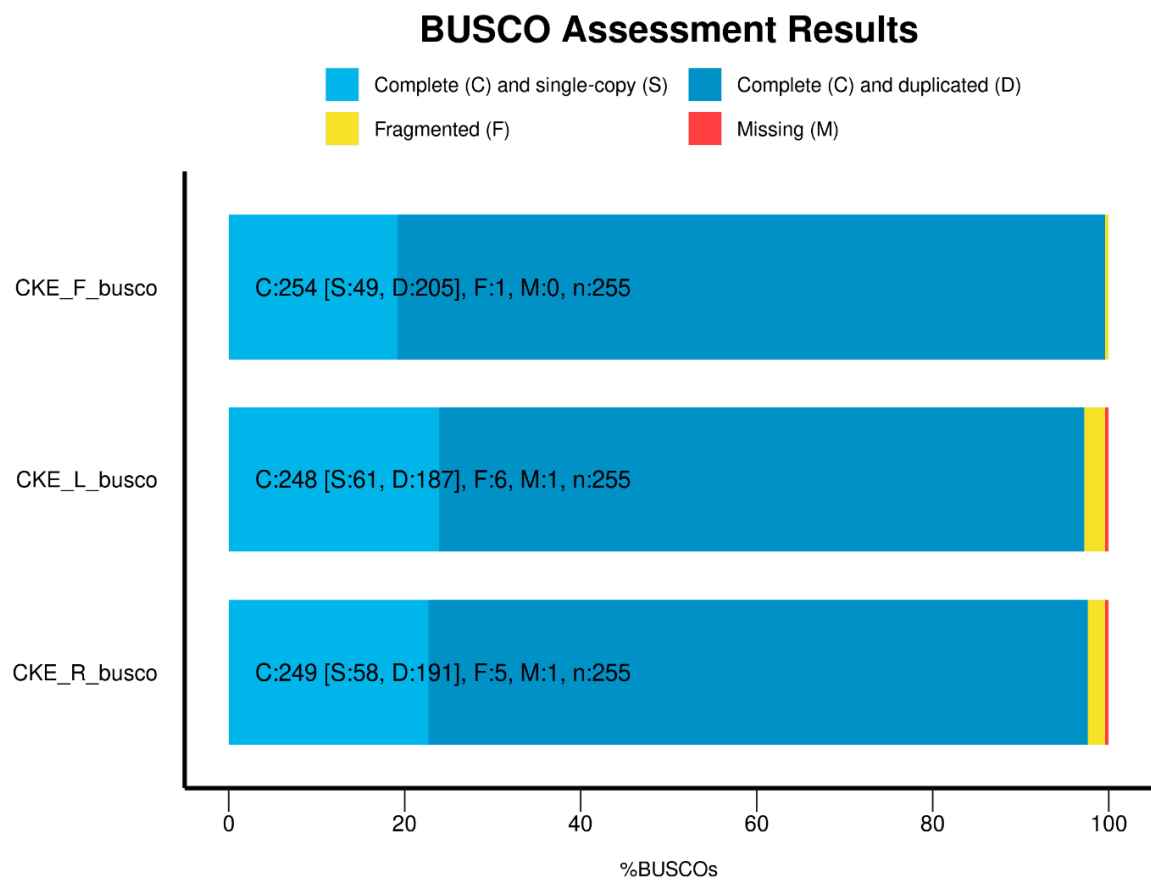

Supplementary Fig S2. BUSCO assessments of *Convallaria keiskei* transcriptome assembly

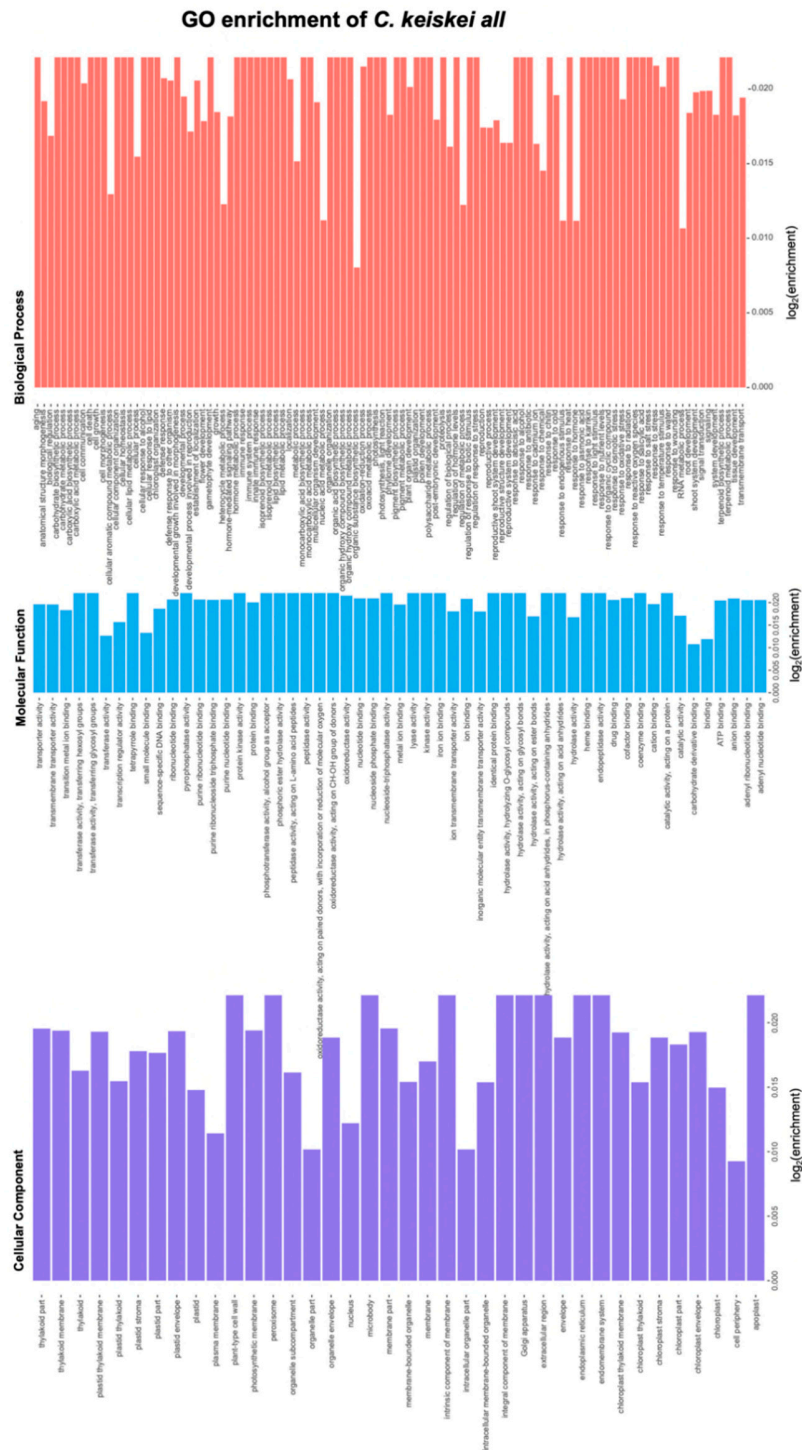

**Supplementary Fig S3.** Gene Ontology (GO) categories of combined transcriptome unigenes from the *C. keiskei* (TRAPID-enrichment analysis). (A) the distribution of biological process unigenes, (B) molecular function (C) cellular component in the *C. keiskei*

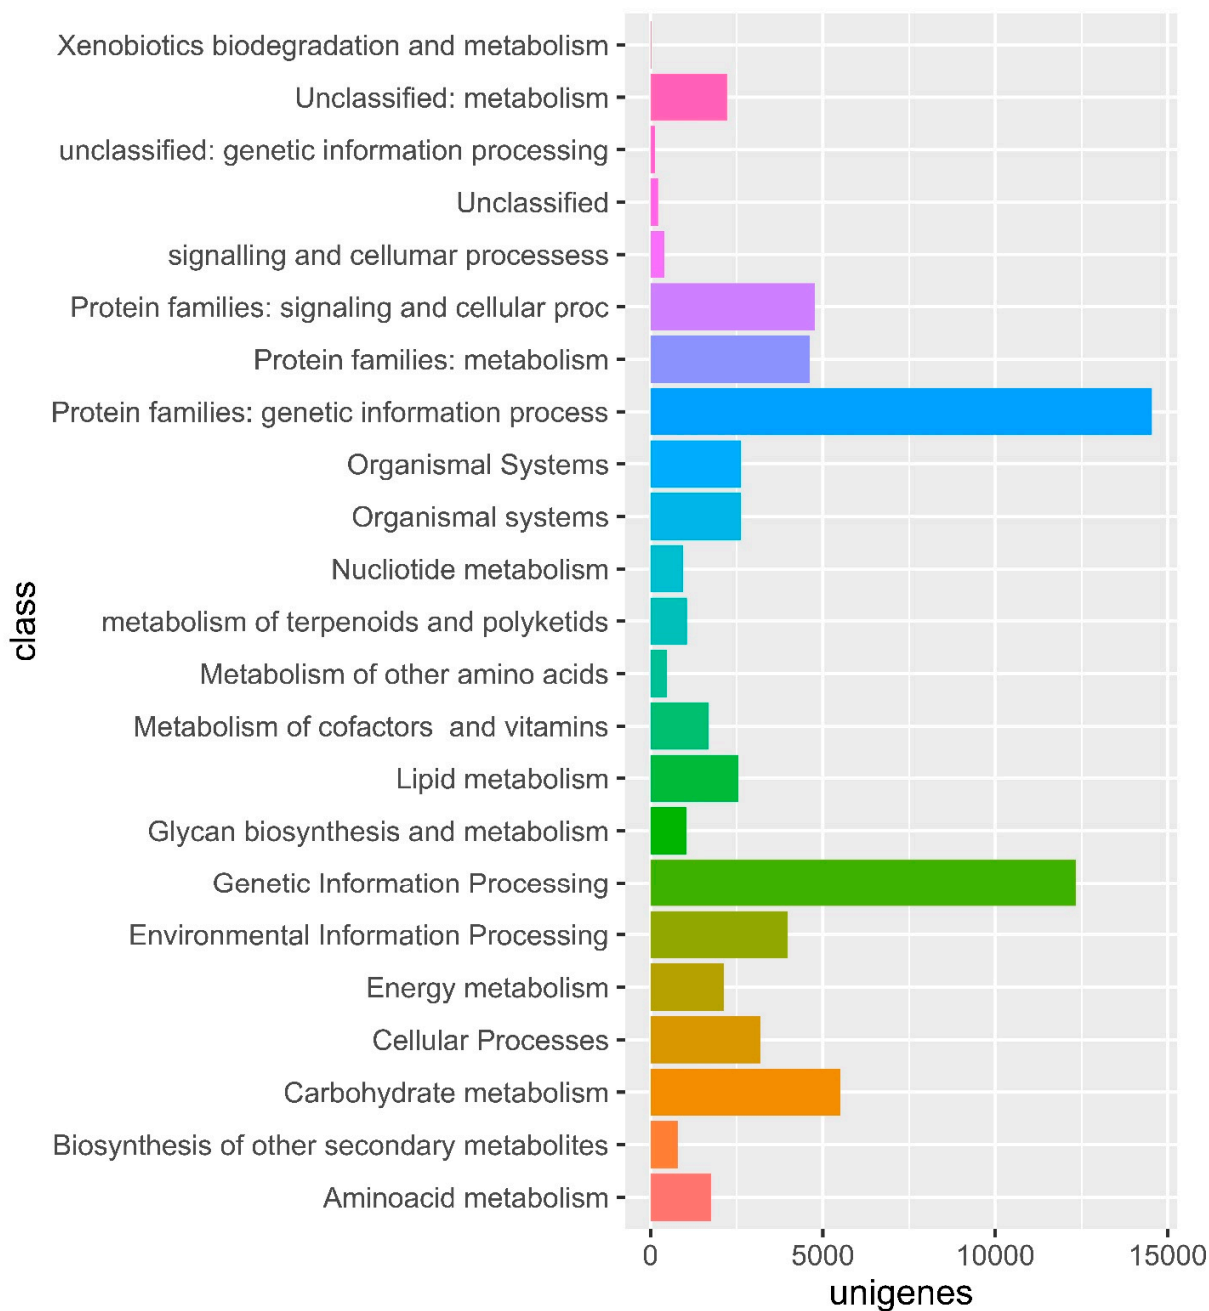

**Supplementary Fig S4.** The distribution of various classes of metabolic unigenes in the *C. keiskei* by KEGG analysis

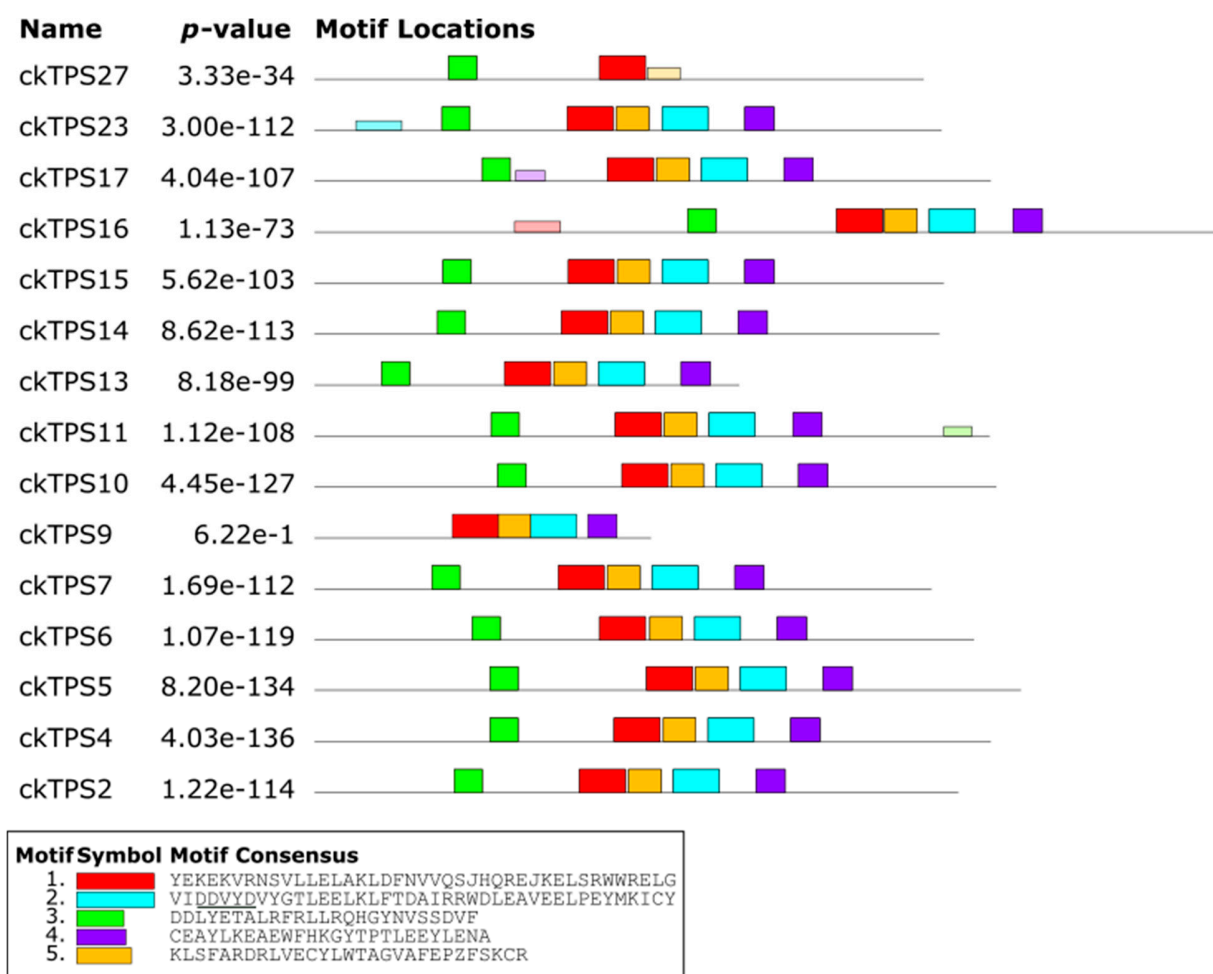

**Supplementary Fig S5.** Phylogenetic tree analysis and identification of linalool, nerolidol, and farnesol gene in *C. keiskei*. The green color rectangular box indicates the phylogenetic tree of all functional terpene synthase genes in the *C. keiskei*

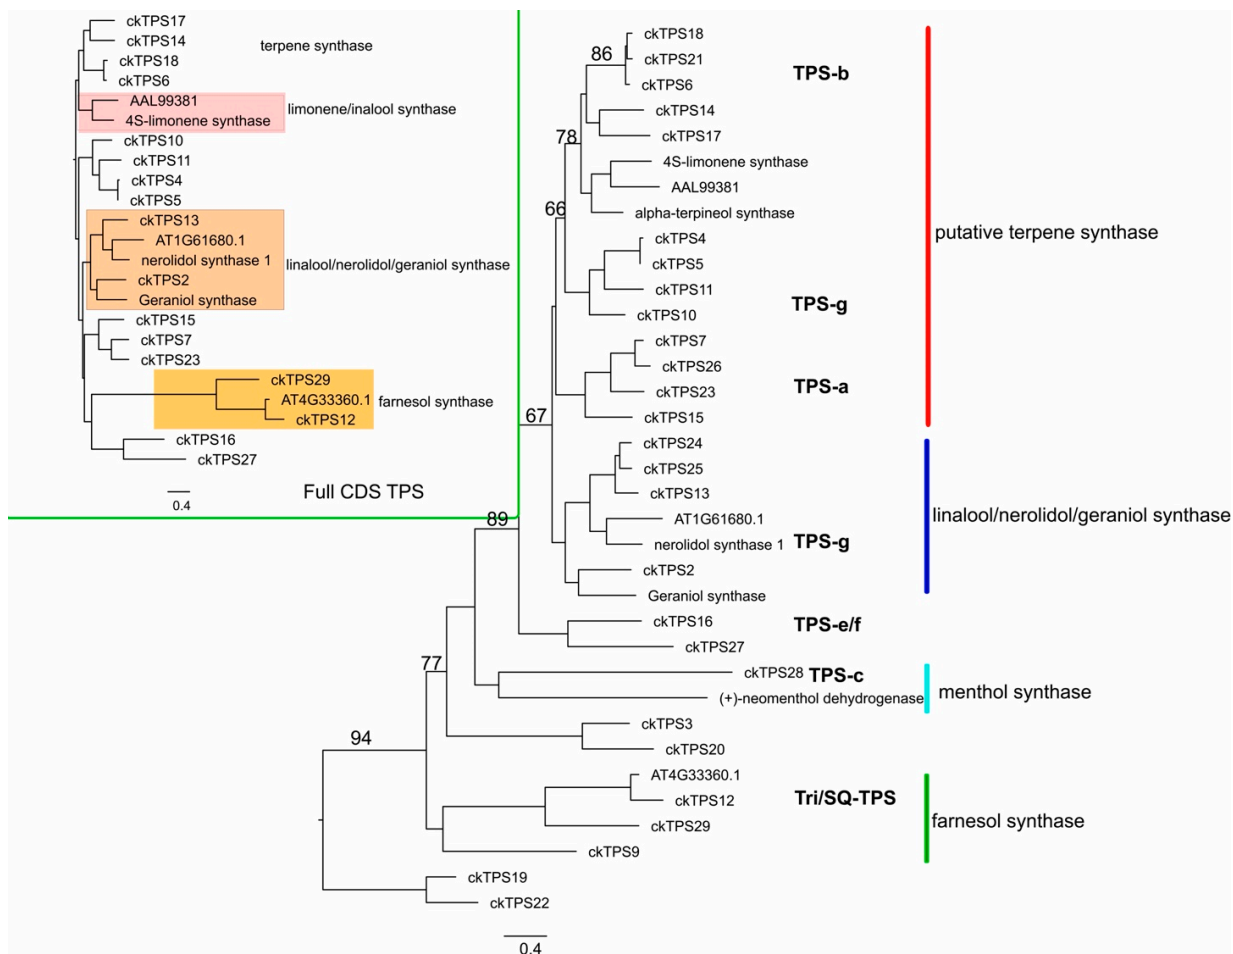

**Supplementary Fig S6.** MEME finding of the conserved domain (RRXXXD and DXXXD) of TPS in *Convallaria keiskei* transcripts

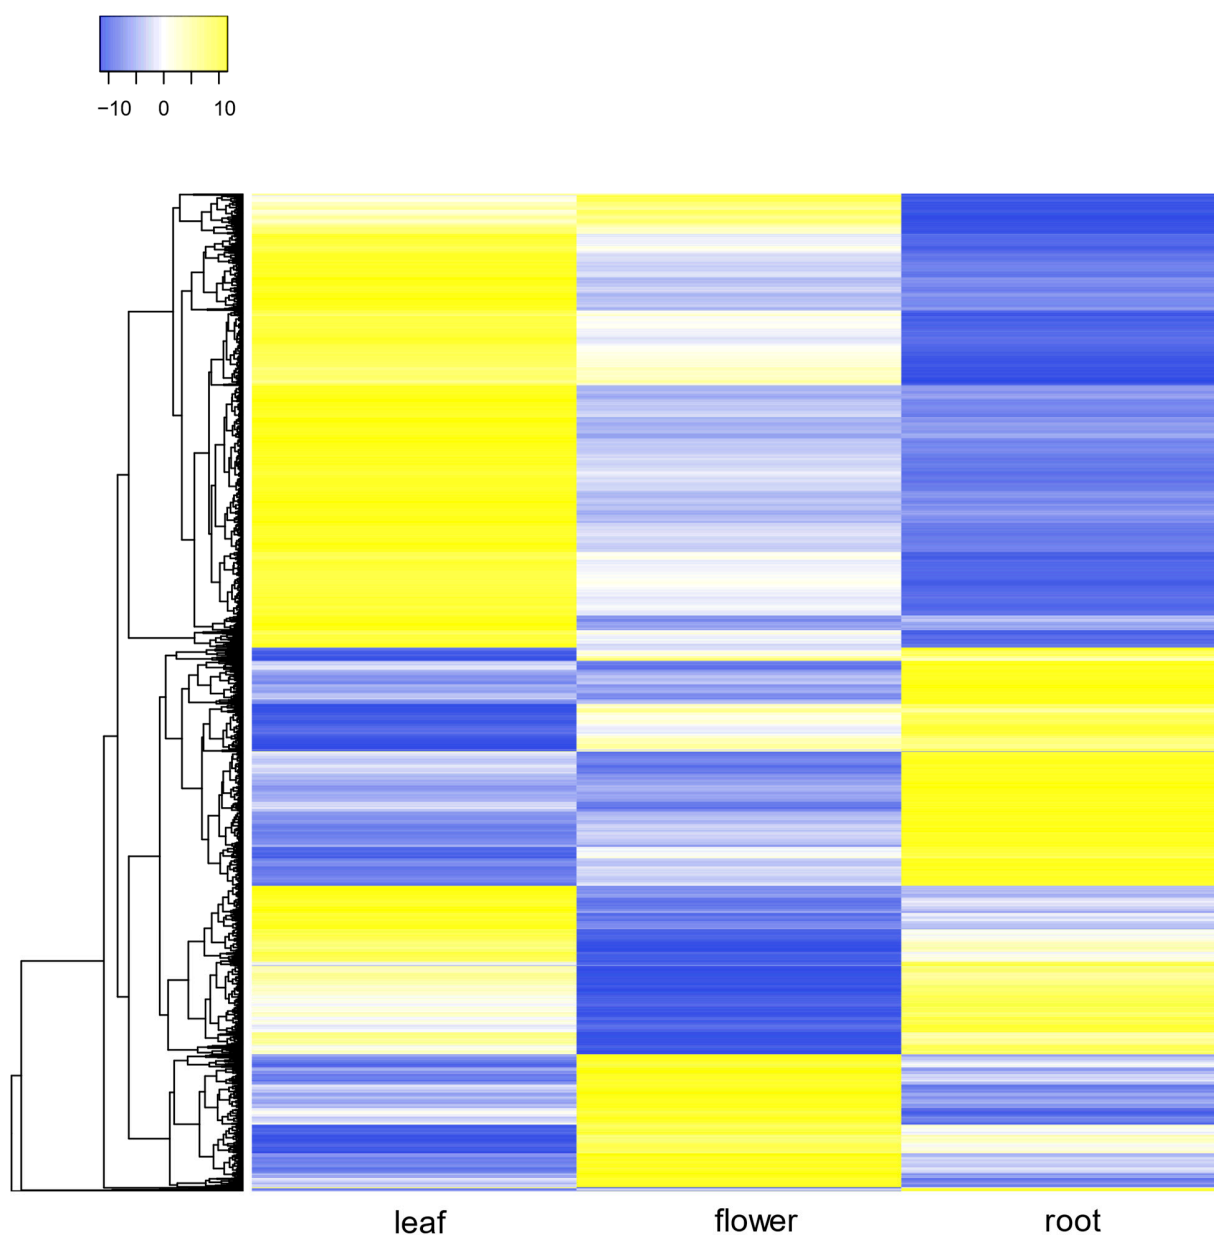

**Supplementary Fig S7.** Heatmap of differentially expressed 3,152 genes in *C. keiskei* from leaf, flower, and root tissue



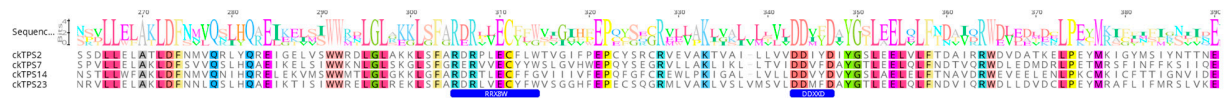

**Supplementary Fig S8.** The top four ckTPS genes and their conserved domain of RRX8W and DDXXD domains are aligned sequences

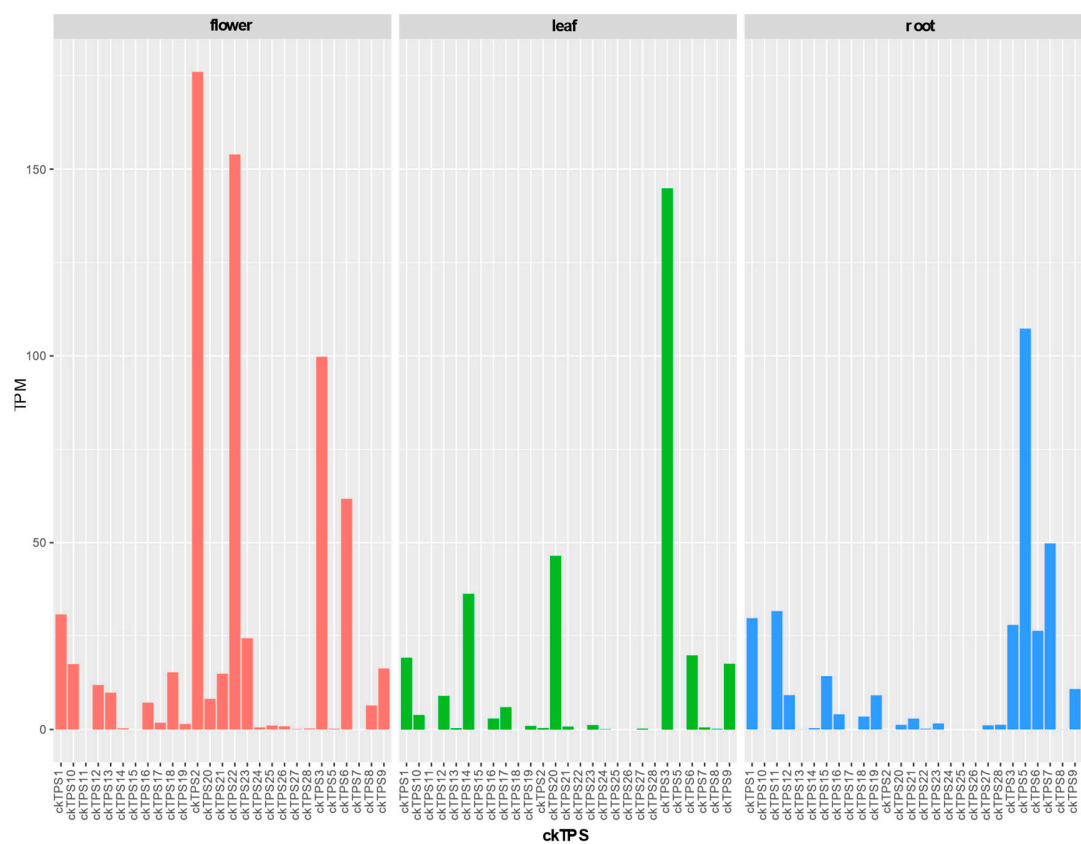

**Supplementary Fig S9.** Bar plots of TPM value of RSEM assessment to the ckTPS genes align, and mapping of *Convallaria keiskei* reads quantification analysis.

**Supplementary Table S2:** List of highly expressed genes in the flower, leaf and root of *C. keiskei* and their role in the plants

| Transcript ID<br>gene name | Enzyme name | Metabolite name | Highly<br>expression | Function |
|----------------------------|-------------|-----------------|----------------------|----------|
|----------------------------|-------------|-----------------|----------------------|----------|

|                               |                             |                           |                       |                                                                                         |
|-------------------------------|-----------------------------|---------------------------|-----------------------|-----------------------------------------------------------------------------------------|
| <i>ckTPS2</i>                 | Geraniol synthase           | Monoterpene               | Flower                | Floral scent, defense mechanism, stress response, medicinal properties                  |
| <i>ckTPS23</i>                | Germacrene (Ger D) synthase | sesquiterpene             | Flower                | Floral scent, defense mechanism, stress response, medicinal properties                  |
| <i>ckTPS13</i>                | Nerolidol synthase          | Nerolidol (sesquiterpene) | Flower                | Floral scent, defense mechanism, stress response, medicinal properties                  |
| <i>ckTPS7</i>                 | Valencene synthase          | Valencene (sesquiterpene) | Flower and Root       | Floral scent, citrus aroma, insect repellent, stress response, medicinal properties     |
| <i>ckTPS4, 5, 10</i>          | Trans-ocimene               | Monoterpene               | Flower and Root       | Floral scent, plant communications, insect attraction and repellence, stress response   |
| <i>ckTPS16, 27, 28</i>        | Kaurene synthase            | Diterpenoid               | Flower, Leaf and Root | Precursor for plant hormone, gibberellins (GAS); plant growth and developmental process |
| <i>ckTPS11</i>                | Trans-ocimene               | Monoterpene               | Leaf and Root         | Floral scent, plant communications, insect attraction and repellence, stress response   |
| <i>ckTPS6, 14, 17, and 18</i> | linalool synthase           | Monoterpene               | Flower                | Floral scent, defense mechanism, stress response, medicinal properties                  |

**Supplementary Table S4.** Top upregulated in leaf, flower, and root of *C. keiskei* using DEGs analysis

| unigenes             | leaf        | flower      | root        | description                                        |
|----------------------|-------------|-------------|-------------|----------------------------------------------------|
|                      | leaf        |             |             |                                                    |
| TRINITY_DN865_c1_g2  | 6.405638032 | -1.26017827 | -5.14545977 | plastocyanin 1                                     |
| TRINITY_DN5007_c0_g1 | 6.062331346 | -2.22416415 | -3.8381672  | Aldolase superfamily protein                       |
| TRINITY_DN1598_c0_g2 | 5.989057744 | -1.61804756 | -4.37101018 | galactinol synthase 4                              |
| TRINITY_DN21_c0_g1   | 5.787968911 | -1.11100312 | -4.67696579 | sedoheptulose-bisphosphatase                       |
| TRINITY_DN1598_c0_g1 | 5.758316198 | -2.11187826 | -3.64643794 | galactinol synthase 4                              |
| TRINITY_DN286_c0_g1  | 5.589524419 | -1.40296613 | -4.18655829 | phosphoribulokinase                                |
| TRINITY_DN6998_c0_g1 | 5.236912939 | 0.337748707 | -5.57466165 | glyceraldehyde-3-phosphate dehydrogenase B subunit |
| TRINITY_DN5666_c0_g1 | 5.217190977 | -1.43364094 | -3.78355004 | carbonic anhydrase 1                               |
| TRINITY_DN576_c0_g2  | 5.123788974 | -0.615654   | -4.50813498 | Chalcone-flavanone isomerase                       |

|                       |             |             |             |                                                                |
|-----------------------|-------------|-------------|-------------|----------------------------------------------------------------|
| TRINITY_DN4758_c0_g1  | 5.087092031 | -1.23966453 | -3.8474275  | hydroxypyruvate reductase                                      |
| <b>flower</b>         |             |             |             |                                                                |
| TRINITY_DN6014_c0_g1  | -5.56887964 | 5.709013887 | -0.14013425 | lipid transfer protein 3                                       |
| TRINITY_DN849_c1_g1   | -2.18822494 | 4.806813116 | -2.61858817 | terpene synthase (ckTPS2)                                      |
| TRINITY_DN2242_c0_g1  | -0.97237219 | 4.599409052 | -3.62703686 | lipid transfer protein 3                                       |
| TRINITY_DN1432_c0_g1  | -1.10304837 | 4.14912112  | -3.04607275 | GDSL-like Lipase/Acylhydrolase                                 |
| TRINITY_DN62992_c0_g1 | -1.96567148 | 4.127189522 | -2.16151804 | glycosylphosphatidylinositol-anchored lipid protein transfer 1 |
| TRINITY_DN9736_c0_g1  | -1.8117389  | 4.033430645 | -2.22169174 | xyloglucan hydrolase 24                                        |
| TRINITY_DN23_c0_g6    | -3.47605855 | 3.93988504  | -0.46382649 | geranylgeranyl reductase                                       |
| TRINITY_DN2504_c0_g1  | -0.77319421 | 3.812773352 | -3.03957915 | expansin A8                                                    |
| TRINITY_DN1646_c0_g1  | -2.69359083 | 3.676653456 | -0.98306263 | lipid transfer protein 6                                       |
| TRINITY_DN2326_c0_g1  | -1.23223387 | 3.393354818 | -2.16112095 | auxin response factor 8                                        |
| <b>root</b>           |             |             |             |                                                                |
| TRINITY_DN16033_c0_g1 | -4.80268602 | -2.23076249 | 7.033448508 | Curculin-like lectin protein                                   |
| TRINITY_DN95_c1_g1    | -4.52951627 | -1.91574356 | 6.445259824 | magnesium transporter 4                                        |
| TRINITY_DN16762_c1_g3 | -4.18808015 | -1.99380172 | 6.181881871 | Lipase/lipoxygenase2C                                          |
| TRINITY_DN11363_c0_g1 | -4.48233334 | -0.1852887  | 4.667622039 | O-methyltransferase protein                                    |
| TRINITY_DN2596_c0_g1  | -0.39342283 | -3.73521135 | 4.128634174 | Glycosyl hydrolases 32 protein                                 |
| TRINITY_DN7764_c0_g1  | -1.71046321 | -2.34420809 | 4.054671301 | allene oxide synthase                                          |
| TRINITY_DN5605_c1_g1  | -0.69811789 | -3.2526453  | 3.95076319  | metallothionein 2A                                             |
| TRINITY_DN38071_c0_g2 | -2.11958887 | -1.72672195 | 3.846310825 | methylesterase PCR A                                           |
| TRINITY_DN4058_c0_g1  | -1.4682735  | -2.09961065 | 3.567884145 | terpene synthase (ckTPS7)                                      |
| TRINITY_DN4084_c0_g1  | -1.54330777 | -1.94182255 | 3.485130324 | ferulic acid 5-hydroxylase 1                                   |

**Supplementary Table S5.** Top down-regulated genes of leaf, flower, and root of *C. keiskei* using DEGs analysis

| unigenes              | leaf        | flower      | root        | description                                             |
|-----------------------|-------------|-------------|-------------|---------------------------------------------------------|
| <b>leaf</b>           |             |             |             |                                                         |
| TRINITY_DN6014_c0_g1  | -5.56887964 | 5.709013887 | -0.14013425 | lipid transfer protein 3                                |
| TRINITY_DN16033_c0_g1 | -4.80268602 | -2.23076249 | 7.033448508 | Curculin-like protein                                   |
| TRINITY_DN95_c1_g1    | -4.52951627 | -1.91574356 | 6.445259824 | magnesium transporter 4                                 |
| TRINITY_DN11363_c0_g1 | -4.48233334 | -0.1852887  | 4.667622039 | O-methyltransferase family protein                      |
| TRINITY_DN16762_c1_g3 | -4.18808015 | -1.99380172 | 6.181881871 | Lipase/lipoxygenase2C PLAT/LH2 protein                  |
| TRINITY_DN976_c0_g3   | -3.80086743 | 0.80665996  | 2.99420747  | lipoxygenase 1                                          |
| TRINITY_DN2025_c0_g1  | -3.57718121 | 3.357453233 | 0.219727975 | Plantinvertase/pectin methylesterase inhibitor          |
| TRINITY_DN23_c0_g6    | -3.47605855 | 3.93988504  | -0.46382649 | geranylgeranyl reductase                                |
| <b>flower</b>         |             |             |             |                                                         |
| TRINITY_DN10_c0_g1    | 3.303408162 | -4.68488032 | 1.381472157 | O-methyltransferase family protein                      |
| TRINITY_DN4250_c0_g1  | 0.822584011 | -4.04768682 | 3.225102806 | O-methyltransferase family protein                      |
| TRINITY_DN2596_c0_g1  | -0.39342283 | -3.73521135 | 4.128634174 | Glycosyl hydrolases family 32 protein                   |
| TRINITY_DN395_c0_g1   | 3.577352098 | -3.68923201 | 0.111879912 | O-methyltransferase family protein                      |
| TRINITY_DN6674_c0_g1  | 1.532701824 | -3.36812021 | 1.835418385 | beta glucosidase 16                                     |
| TRINITY_DN5605_c1_g1  | -0.69811789 | -3.2526453  | 3.95076319  | metallothionein 2A                                      |
| TRINITY_DN1598_c1_g1  | 0.792285086 | -3.21725581 | 2.424970728 | galactinol synthase 1                                   |
| TRINITY_DN7468_c0_g1  | -0.43588815 | -2.89105522 | 3.326943376 | glutathione S-transferase TAU 20                        |
| TRINITY_DN3105_c0_g1  | 1.846122569 | -2.86769847 | 1.0215759   | Glycosyl hydrolases family 32 protein                   |
| <b>root</b>           |             |             |             |                                                         |
| TRINITY_DN6674_c0_g2  | 4.525353113 | 1.442954261 | -5.96830737 | beta glucosidase 17                                     |
| TRINITY_DN6998_c0_g1  | 5.236912939 | 0.337748707 | -5.57466165 | glyceraldehyde-3-phosphate dehydrogenase B subunit      |
| TRINITY_DN865_c1_g2   | 6.405638032 | -1.26017827 | -5.14545977 | plastocyanin 1                                          |
| TRINITY_DN3898_c1_g1  | 4.989146557 | -0.12373722 | -4.86540933 | glyceraldehyde 3-P dehydrogenase A                      |
| TRINITY_DN21_c0_g1    | 5.787968911 | -1.11100312 | -4.67696579 | sedoheptulose-bisphosphatase                            |
| TRINITY_DN6873_c0_g1  | 2.71974644  | 1.929143933 | -4.64889037 | Glutathione S-transferase protein                       |
| TRINITY_DN499_c0_g1   | 4.051126712 | 0.47087128  | -4.52199799 | Glucose-6-phosphate/phosphate translocator-like protein |
| TRINITY_DN576_c0_g2   | 5.123788974 | -0.615654   | -4.50813498 | Chalcone-flavanone isomerase protein                    |
| TRINITY_DN1598_c0_g2  | 5.989058    | -1.61805    | -4.37101    | galactinol synthase 4                                   |
